# Supplementary material for: Hollow structural materials derived from a MOFs/polymer loaded CoRu alloy for significantly boosting electrochemical overall water splitting
Source: Royal Society of Chemistry journal article supplement (doi:10.1039/d3ta06794g), 2024-01-01
Supplement: d3ta06794g1.pdf [file d3ta06794g1.pdf]

## Supporting information

### Hollow structural materials derived from MOFs/Polymer loaded Co-Ru alloy for Significantly Boosting Electrochemical Overall Water Splitting

**Materials.** 2-Methylimidazole (99%), cobalt nitrate hexahydrate ( $\text{Co}(\text{NO}_3)_2 \cdot 6(\text{H}_2\text{O})$ ), Zinc nitrate hexahydrate, methanol (HPLC), dopamine hydrochloride (DA) and Ruthenium chloride hydrate were purchased from Aladdin and used without further purification.

**Synthesis of ZIF-67.** Two solutions were prepared by dissolving 1.7 mmol (498 mg) of  $\text{Co}(\text{NO}_3)_2 \cdot 6\text{H}_2\text{O}$  and 17 mmol (1400 mg) of 2-methylimidazole in 50 mL of methanol, respectively. Then, at room temperature, two solutions were mixed together and standing for 12 h. The light-purple products were centrifuged for 8 min (5000 rpm), washed 3 times and dissolved at 30 mL of methanol.

**Synthesis of ZIF-8.** The synthesis method was the same as ZIF-67. 3 mmol (892mg) of Zinc nitrate hexahydrate was dissolved in 30ml methanol. 12mmol (985mg) of 2-methylimidazole in 5 mL of methanol. Then, at room temperature, two solutions were mixed together and standing for 12 h. The products were centrifuged for 8 min (5000 rpm), washed 3 times and dissolved at 30 mL of methanol.

**Synthesis of CoRu/PDA Hollow Nanostructures (CoRu/PDA HNSs).** First, removing the solution containing 60 mg ZIF-67 from the above ZIF-67 solution dispersed in 55 mL of methanol; then, 10 mL of 10mg Ruthenium chloride hydrate methanol solution and 15mL of 20 mM DA methanol solution was added. After that, the mixture was stirred at 60 °C for different time (7h, 8h, 9h and 10h). The products were collected via centrifugation for 8 min (8000 rpm), washed 3 times by methanol, and dried at 60 °C for 12 h.

**Synthesis of ZnRu/PDA Hollow Nanostructures (ZnRu/PDA HNSs).** The synthesis method was the same as CoRu/PDA HNSs. Simply replaced 60mg of ZIF-67 solution with 60mg ZIF-8 and the reaction time was 9h.

**Synthesis of Co/PDA Hollow Nanostructures (Co/PDA HNSs).** Compared to the synthesis method of CoRu/PDA HNSs, just Ruthenium chloride hydrate methanol solution was not added and the reaction time was also 9h.

**Synthesis of CoRu@N-Doped Carbon Hollow Nanostructures (CoRu@NCHNSs) catalysts.**

CoRu/PDA HNSs were used as precursors to synthesize CoRu@NCHNSs catalysts. The powder of CoRu/PDA HNSs was placed in a tube furnace and heated to 750°C for 2 h in flowing Ar with a ramp rate of 5 °C·min<sup>-1</sup> to prepare CoRu@NCHNSs.

**Synthesis of Co@N-Doped Carbon Hollow Nanostructures (Co@NCHNSs) and ZnRu@N-Doped Carbon Hollow Nanostructures (ZnRu@NCHNSs) catalysts.** The synthesis method was the same as CoRu@N-Doped Carbon Hollow Nanostructures (CoRu@NCHNSs) catalysts.

**Characterization.** Hitachi H-800 and JEM-2100F electron microscopes were used to collect transmission electron microscopy (TEM) images at 200 kV with a CCD camera. A JEOL FESEM 6700F electron microscope was used to take scanning electron microscopy (SEM) images at 3 kV. Nickel-filtered Cu K $\alpha$  radiation was used to perform X-ray diffraction (XRD) analysis, and the data were collected from 5 to 80° (model Rigaku RU-200B). An ESCALAB 250 spectrometer was used to perform X-ray photoelectron spectroscopic (XPS) analysis. The metal content was obtained using inductively coupled plasma-optical emission spectrometry (ICP-OES) analyzer (ELAN 9000/DRC).

**Electrochemical Measurements.** A CHI660E electrochemical analyzer was used to characterize all of the performances of electrocatalytic activity. A three-electrode setup was used to evaluate electrochemical measurements with a Hg/HgO (1M KOH solution) electrode as the reference electrode and a graphite rod electrode as the counter electrode. The working electrode was a glassy carbon (GC) electrode with 3 mm in diameter. Five mg of catalyst powders was dispersed in 1 mL of solution containing 0.96 mL of methanol and 40  $\mu$ L of 5.0 wt % Nafion ethanol solution to prepare the catalyst suspension, followed by ultrasonication for 20 min. The above suspension (10  $\mu$ L) was dropped on the polished GC electrode and then dried at room temperature. Potentials were referenced to a reversible hydrogen electrode (RHE):  $E_{\text{RHE}} = E_{\text{Hg/HgO}} + 0.098 + 0.059 \times \text{pH}$ . OER and HER performance was evaluated by linear sweep voltammetry (LSV) in 1.0 M KOH at a scan rate of 10 mV·s<sup>-1</sup>. Long-term chronoamperometry and cyclic voltammetry (CV) scanning were used to carry out the stability tests. Electrochemical impedance spectroscopy (EIS) measurements were performed at different potentials from 10<sup>5</sup> to 0.1 Hz. A two-electrode cell was used to perform the activity of overall water splitting in 1.0 M KOH solution.

**Calculation details**

## 1. ECSA calculations:

The electrochemical surface area (ECSA) and ECSA-normalized current density is calculated as follows<sup>1</sup> :

$$\text{ECSA} = C_{dl}/C_s \quad (1)$$

$$\text{ECSA-normalized current density} = \text{current density}/\text{ECSA} \quad (2)$$

where  $C_s$  was the specific capacitance and the value of  $C_s$  was  $0.04 \text{ mF cm}^{-2}$  according to related reports.

## 2. TOF calculations:

The turnover frequency (TOF) can be calculated according to the following equation<sup>2</sup> :

$$\text{TOF} = \frac{j(\eta)A}{ZnF}$$

where  $j(\eta)$  is the current density ( $\text{A cm}^{-2}$ ) of the LSV for different catalysts;  $A$  is the geometric testing area of electrode ( $\text{cm}^2$ );  $Z$  means the number of electrons transferred (OER:  $Z = 4$ );  $n$  is the number of surface active sites (mol);  $F$  is the Faraday constant ( $96485 \text{ C mol}^{-1}$ ). CV measurements were conducted from  $0.1\text{-}0.2 \text{ V}$  vs. Hg/HgO at  $10 \text{ mV s}^{-1}$  in  $1 \text{ M KOH}$  solution. The absolute components of the voltammetric charges (cathodic and anodic) tested during one CV cycle were calculated ( $Q_+ + Q_- = \text{integral area (I in A and V in V)}/\text{scan rate (in V s}^{-1})$ ). Assuming a one electron redox process and the maximum potential window ( $1.23 \text{ V}$ ), this absolute charge was multiplied by 12.3 times and divided by two ( $|Q_{\text{max}}| = 12.3 \times (Q_+ + Q_-)/2$ ). The maximum number of surface active sites of the catalysts could be calculated as:  $n_{\text{max}} = |Q_{\text{max}}|/F$ , then the minimum TOF values were obtained.

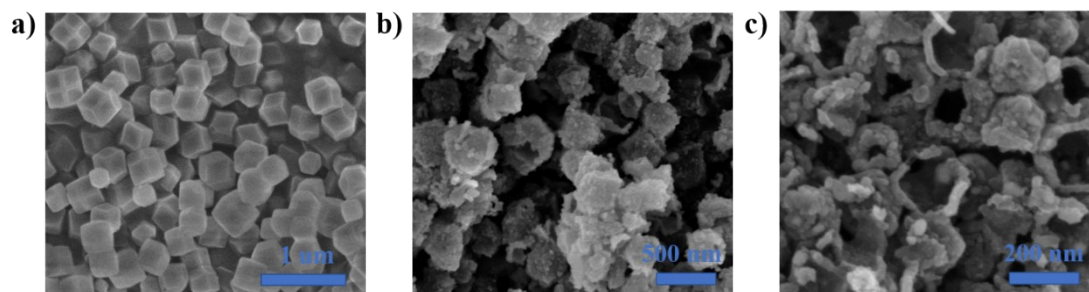

**Figure S1.** SEM images of the (a) ZIF-67, (b) CoRu/PDA HNSs-9h and (c) CoRu@NCHNSs-9h.

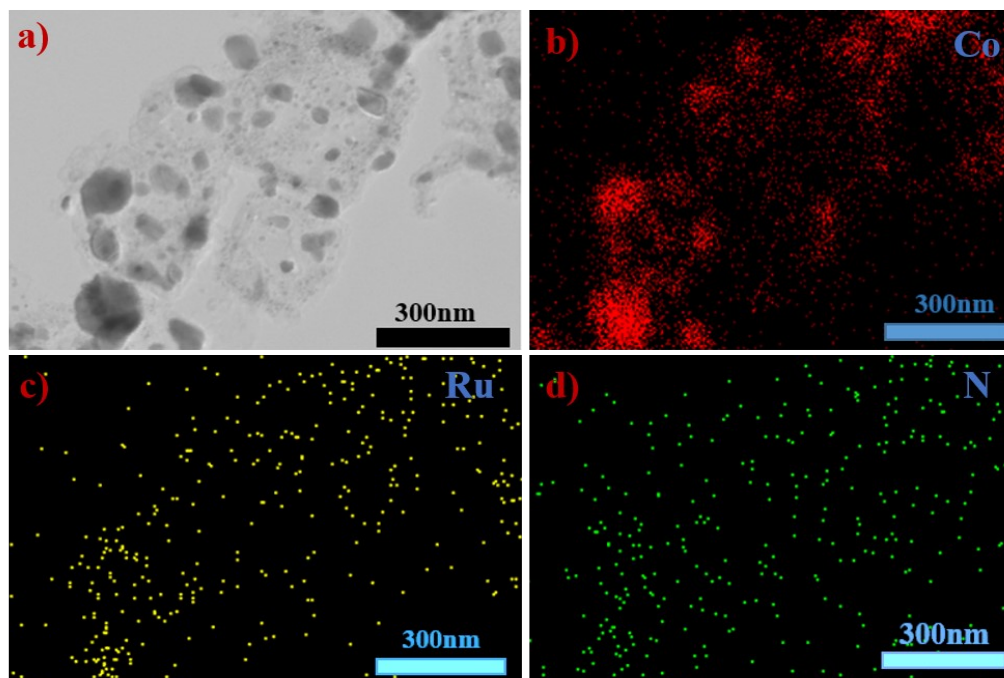

**Figure S2.** (a) TEM images of CoRu@NCHNSs-9h, (b-d) corresponding mapping images of CoRu@NCHNSs-9h.

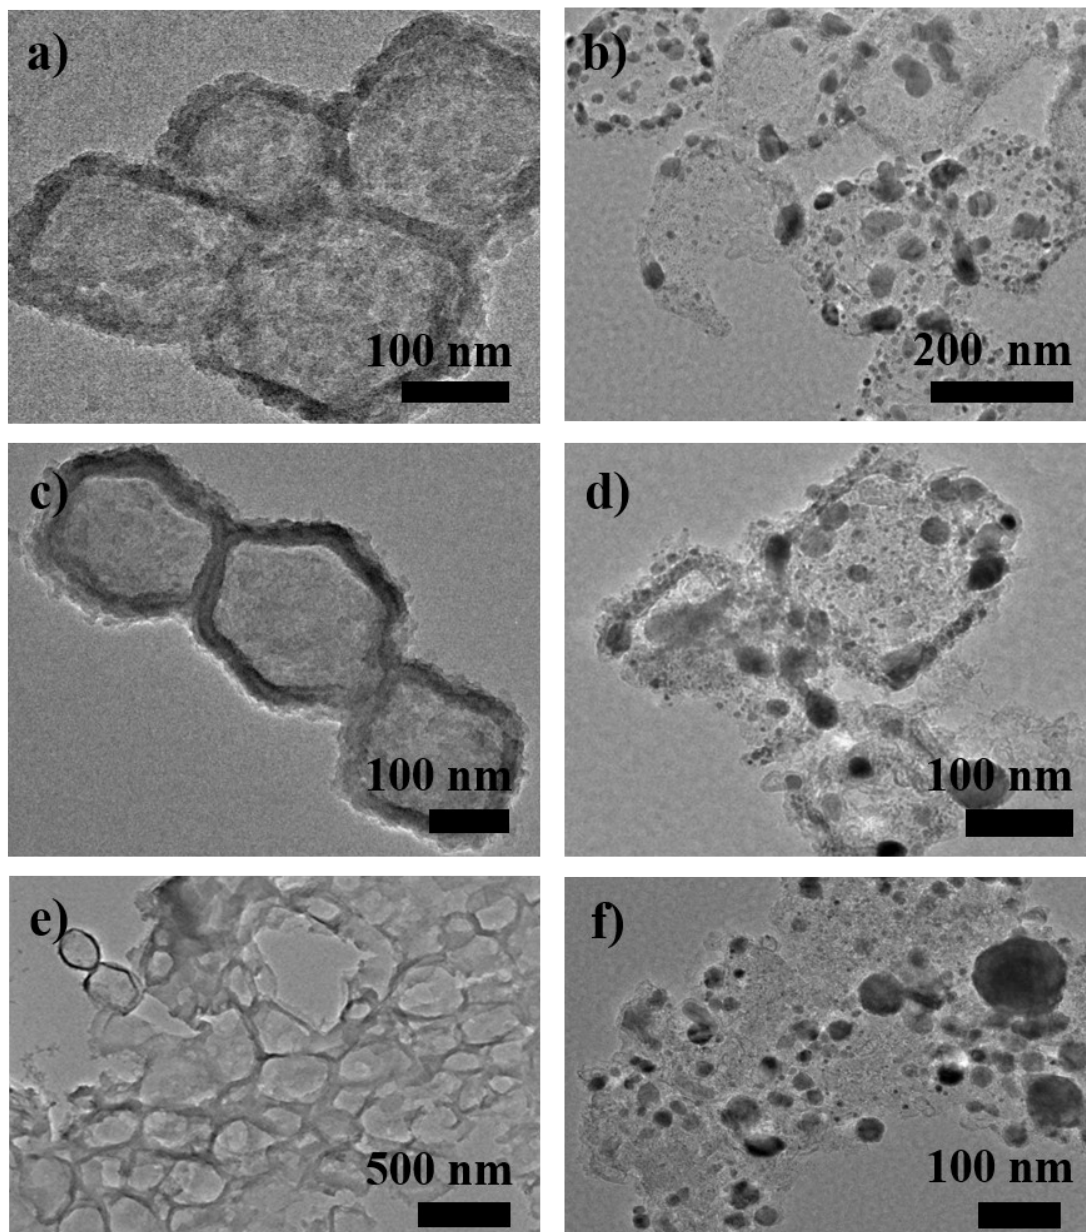

**Figure S3.** TEM images of (a) the CoRu/PDA HNSs-7h, (b) CoRu@NCHNSs-7h, (c) CoRu/PDA HNSs-8h, (d) CoRu@NCHNSs-8h, (e) CoRu/PDA HNSs-10h, (f) CoRu@NCHNSs-10h.

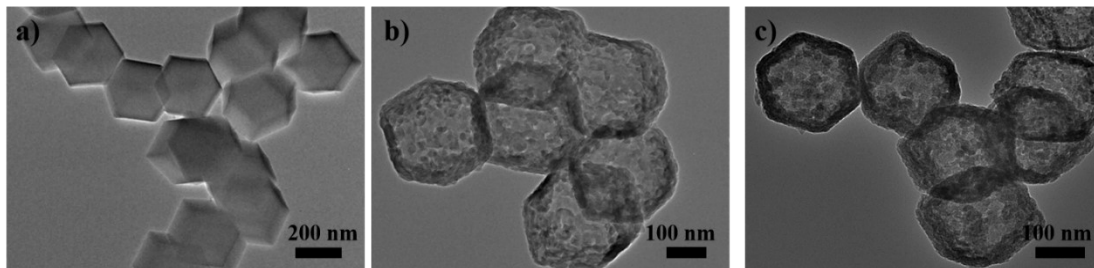

**Figure S4.** TEM images of the (a) ZIF-8, (b) ZnRu/PDA HNSs-9h and (c) ZnRu@NCHNSs-9h.

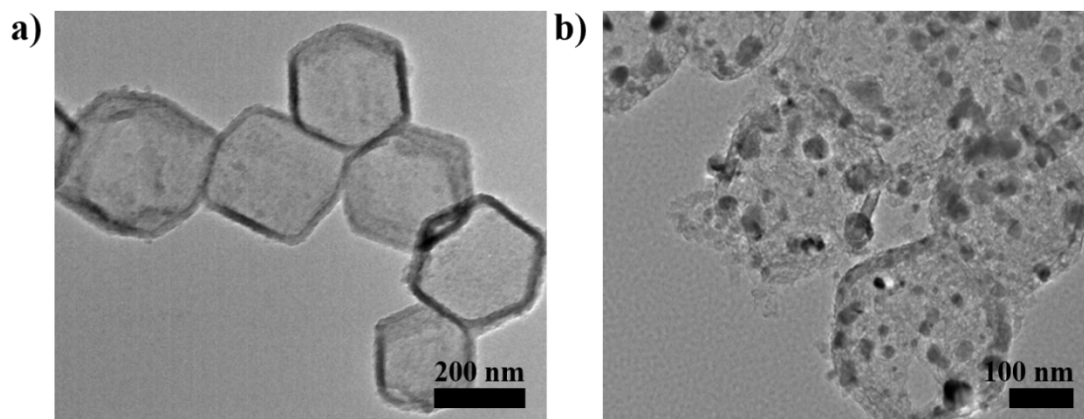

**Figure S5.** TEM images of the (a) Co/PDA HNSs-9h and (b) Co@NCHNSs-9h.



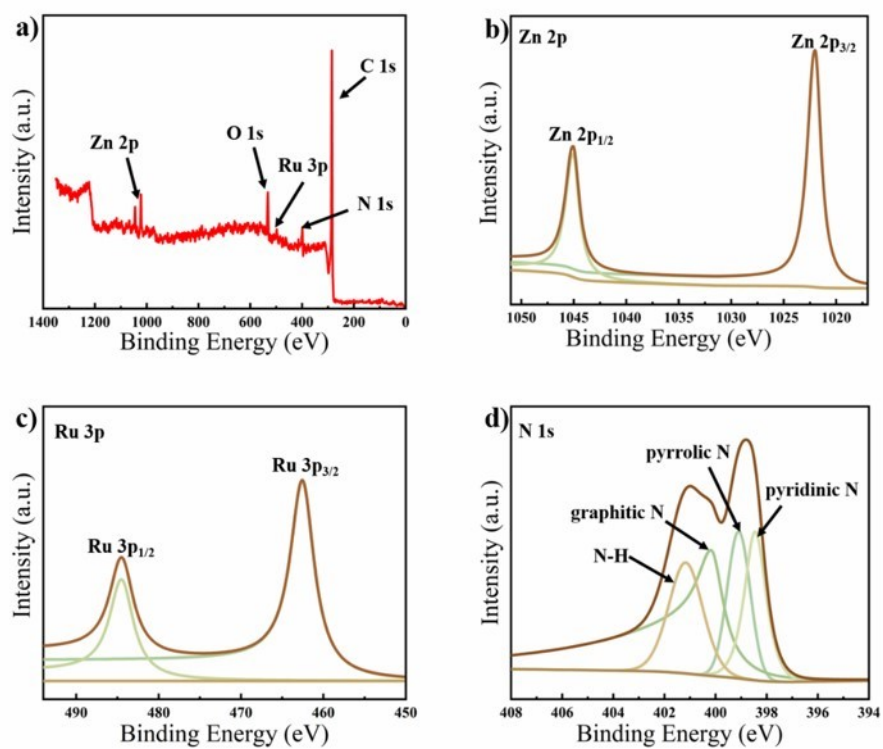

**Figure S6.** (a) Survey scan of the ZnRu@NCHNSs-9h, (b-d) High-resolution XPS spectra of Zn 2p, Ru 3p, N 1s.

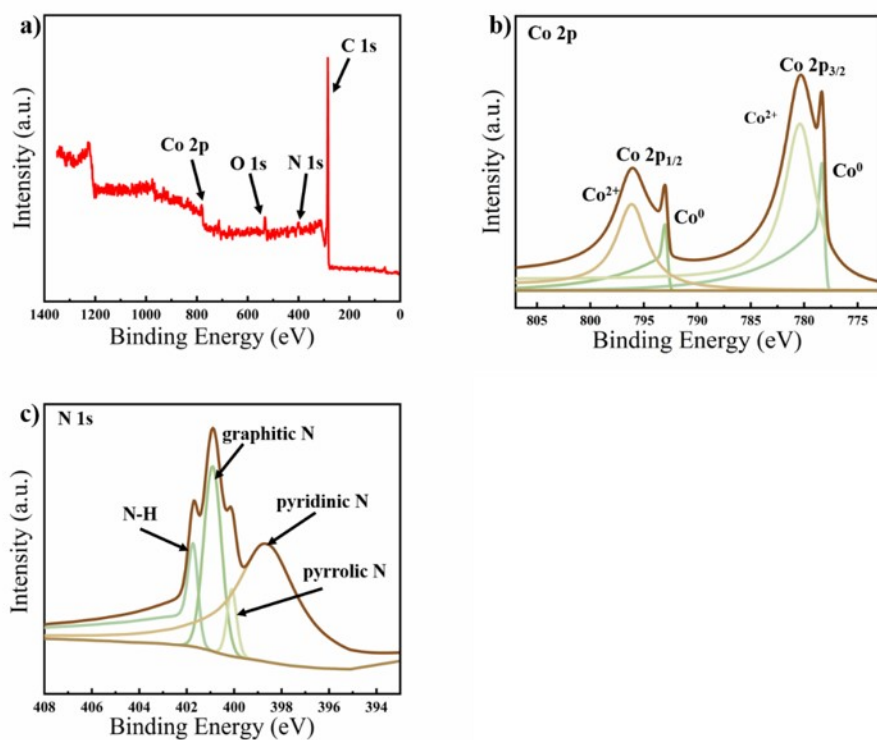

**Figure S7.** (a) Survey scan of the Co@NCHNSs-9h, (b-c) High-resolution XPS spectra of Co 2p, N 1s.

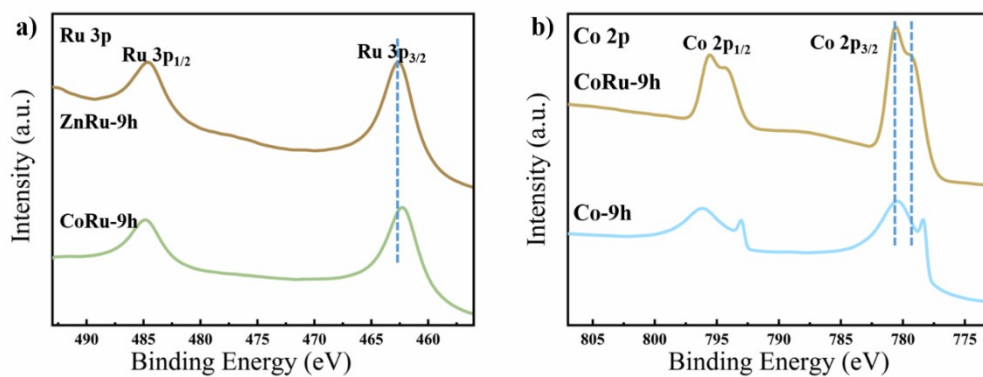

**Figure S8.** (a) Ru 3p high-resolution XPS spectra for CoRu@NCHNSs-9h and ZnRu@NCHNSs-9h, (b) Co 2p high-resolution XPS spectra for CoRu@NCHNSs-9h and Co@NCHNSs-9h.

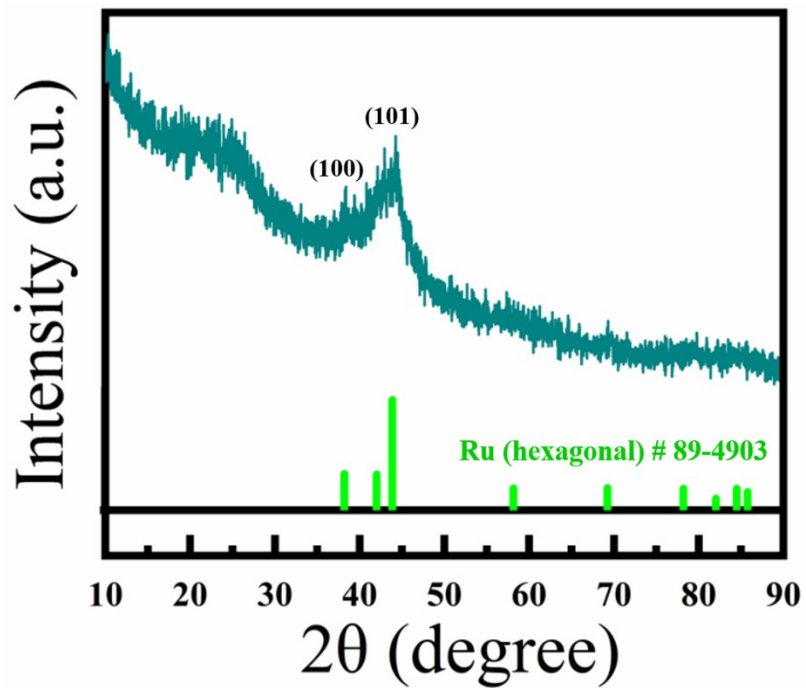

**Figure S9.** XRD pattern of the ZnRu@NCHNSs-9h.

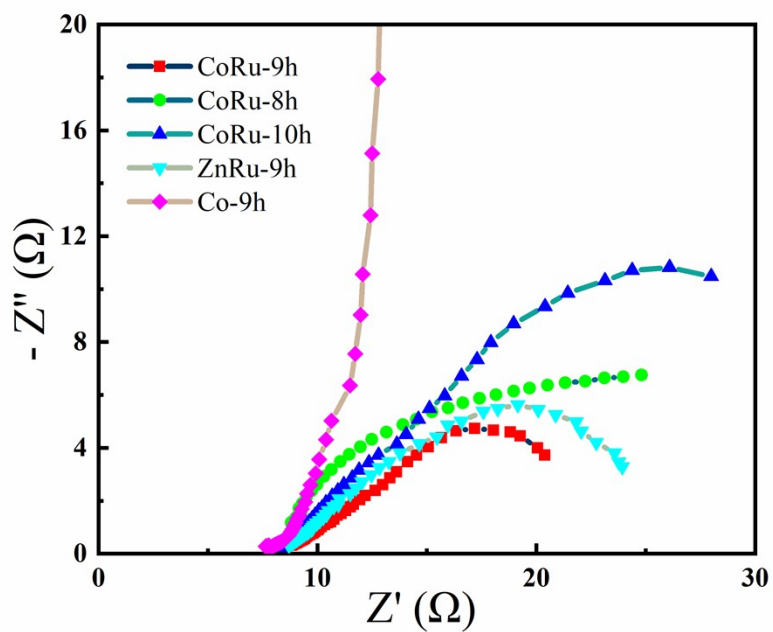

**Figure S10.** EIS Nyquist plots of CoRu@NCHNSs-8h, CoRu@NCHNSs-9h, CoRu@NCHNSs-10h, ZnRu@NCHNSs-9h and Co@NCHNSs-9h catalysts during HER process in 1.0 M KOH solution.

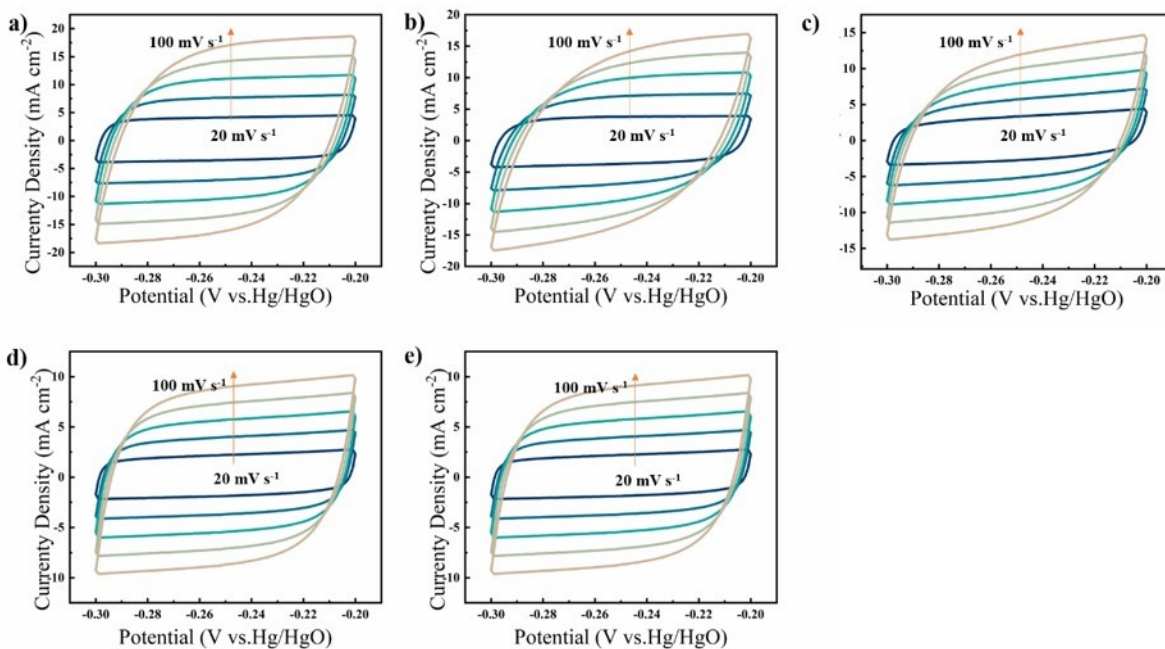

**Figure S11.** The CV curves at different scan rates (20-100 mV·s<sup>-1</sup> with the interval of 10 mV·s<sup>-1</sup>) of (a) CoRu@NCHNSs-9h, (b) ZnRu@NCHNSs-9h, (c) CoRu@NCHNSs-8h, (d) CoRu@NCHNSs-10h, (e) Co@NCHNSs-9h catalysts during HER process in 1.0 M KOH solution.

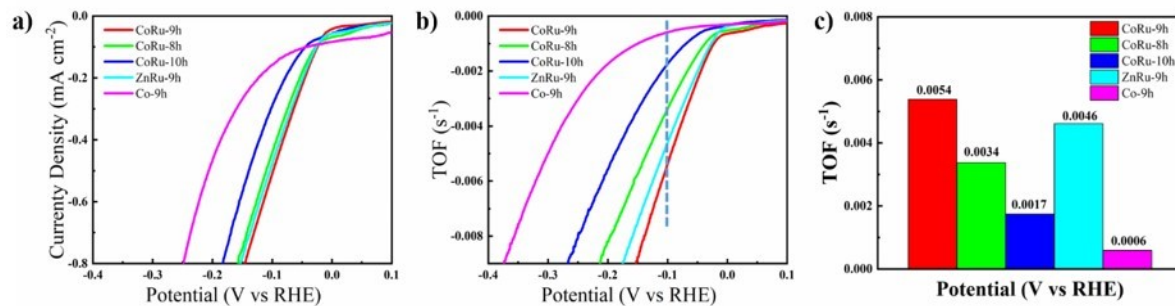

**Figure S12.** (a) HER specific activity curves normalized by ECSA, (b) HER TOF curves, (c) TOF value at a potential of -0.1V.

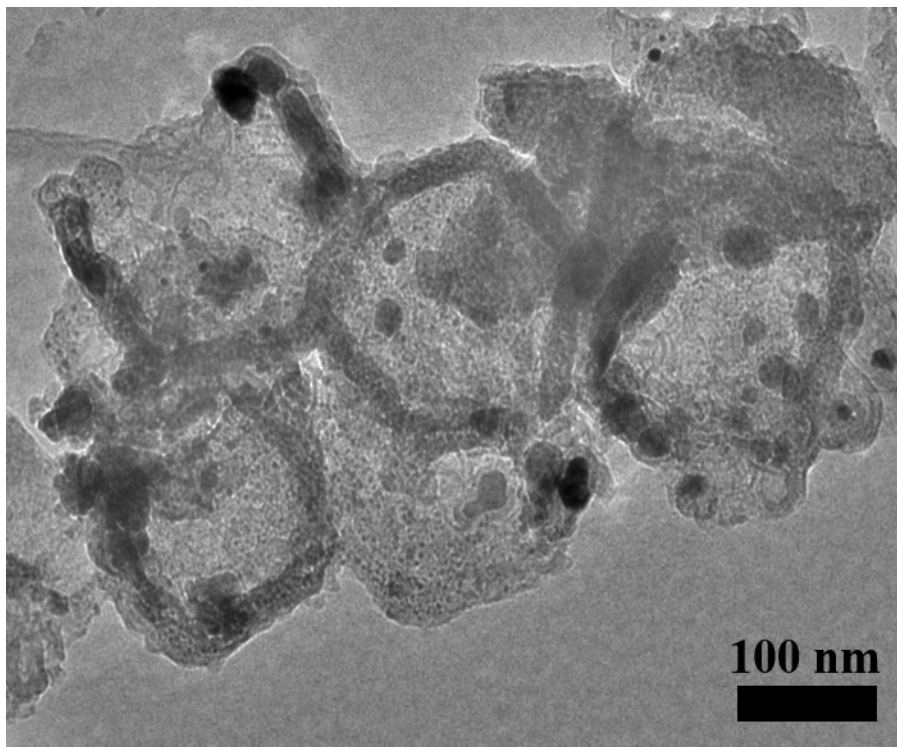

**Figure S13.** TEM image of the CoRu@NCHNSs-9h after HER.



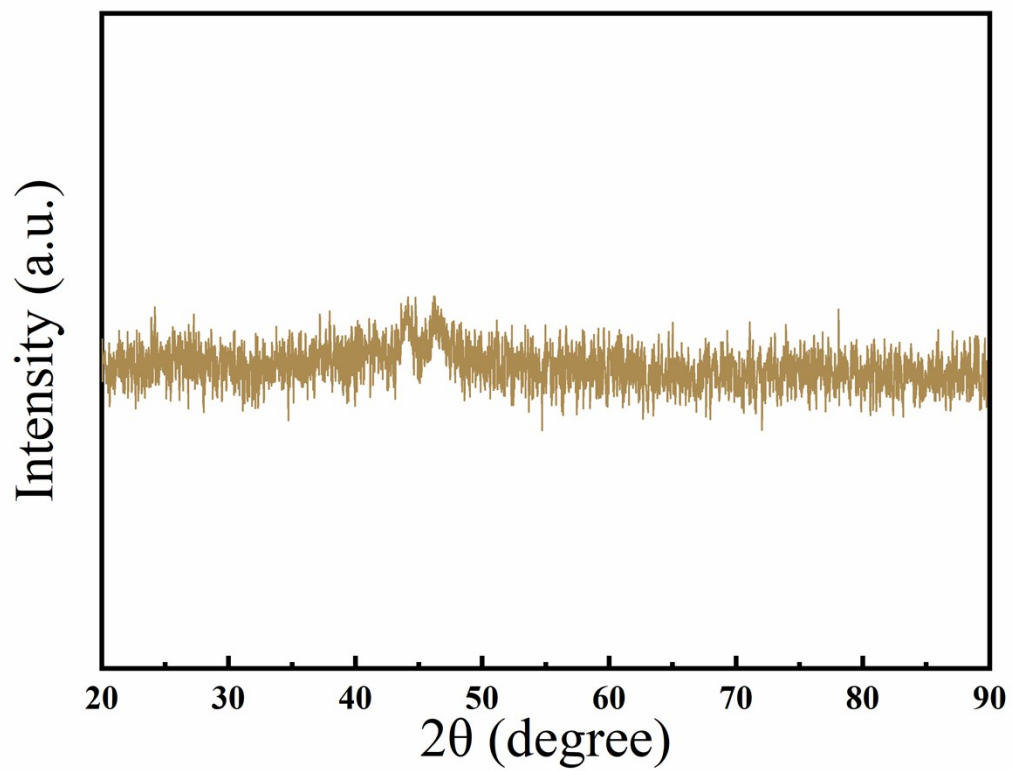

**Figure S14.** XRD pattern of CoRu@NCHNSs-9h after HER.

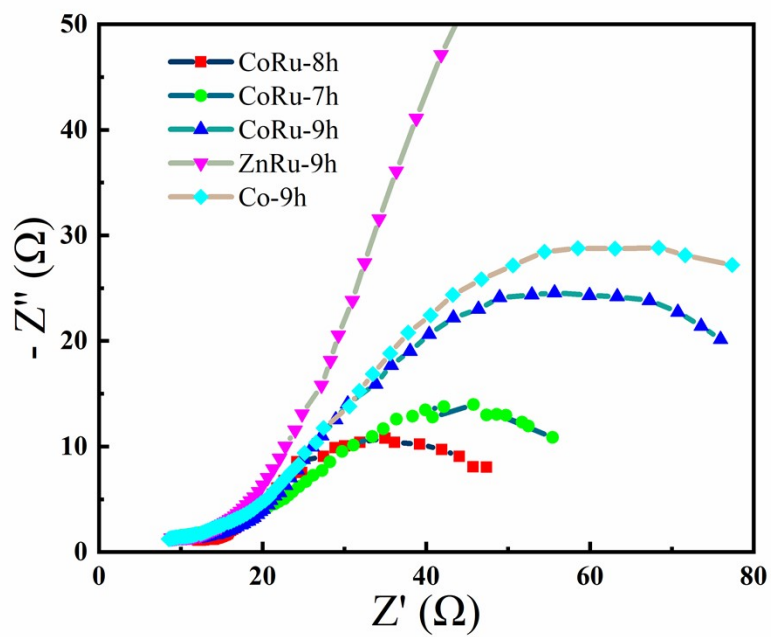

**Figure S15.** EIS Nyquist plots of CoRu@NCHNSs-7h, CoRu@NCHNSs-8h, CoRu@NCHNSs-9h, ZnRu@NCHNSs-9h and Co@NCHNSs-9h catalysts during OER process in 1.0 M KOH solution.

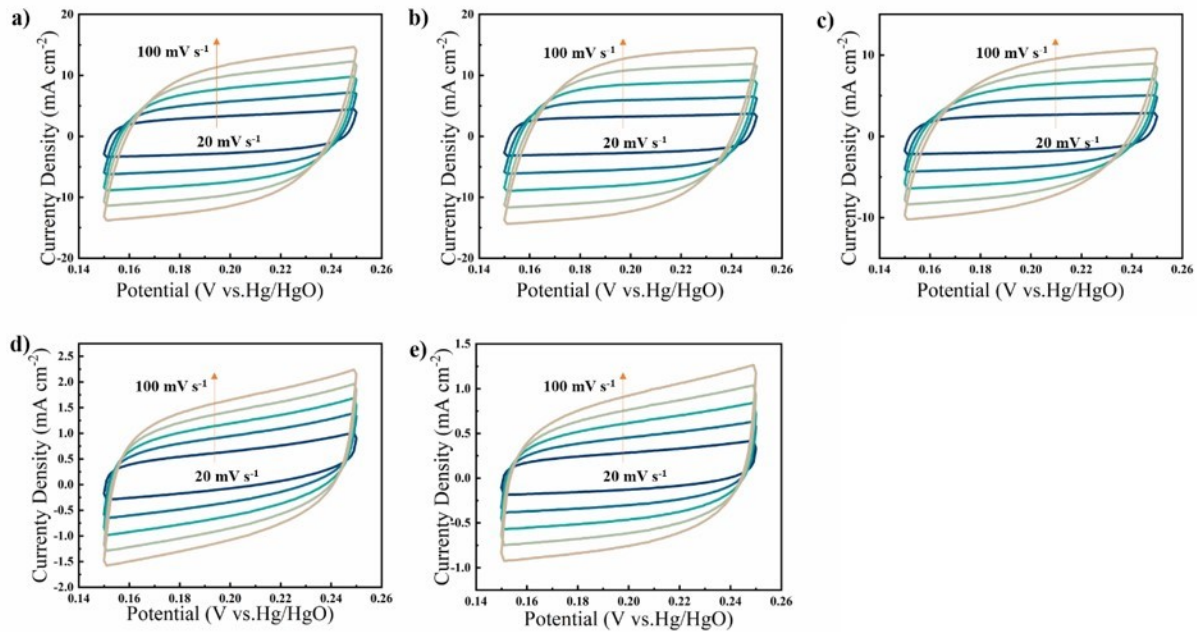

**Figure S16.** The CV curves at different scan rates (20-100  $\text{mV s}^{-1}$  with the interval of  $10 \text{ mV s}^{-1}$ ) of (a) CoRu@NCHNSs-8h, (b) CoRu@NCHNSs-7h, (c) CoRu@NCHNSs-9h, (d) Co@NCHNSs-9h, (e) ZnCo@NCHNSs-9h catalysts during OER process in 1.0 M KOH solution.

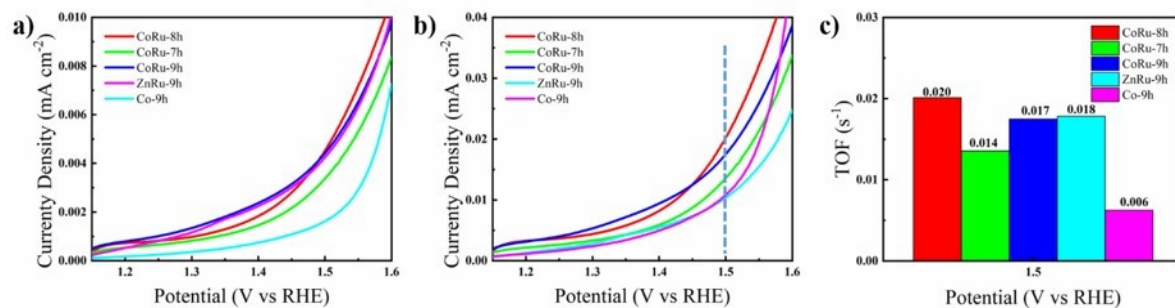

**Figure S17.** (a) OER specific activity curves normalized by ECSA, (b) OER TOF curves, (c) TOF value at a potential of 1.5 V.

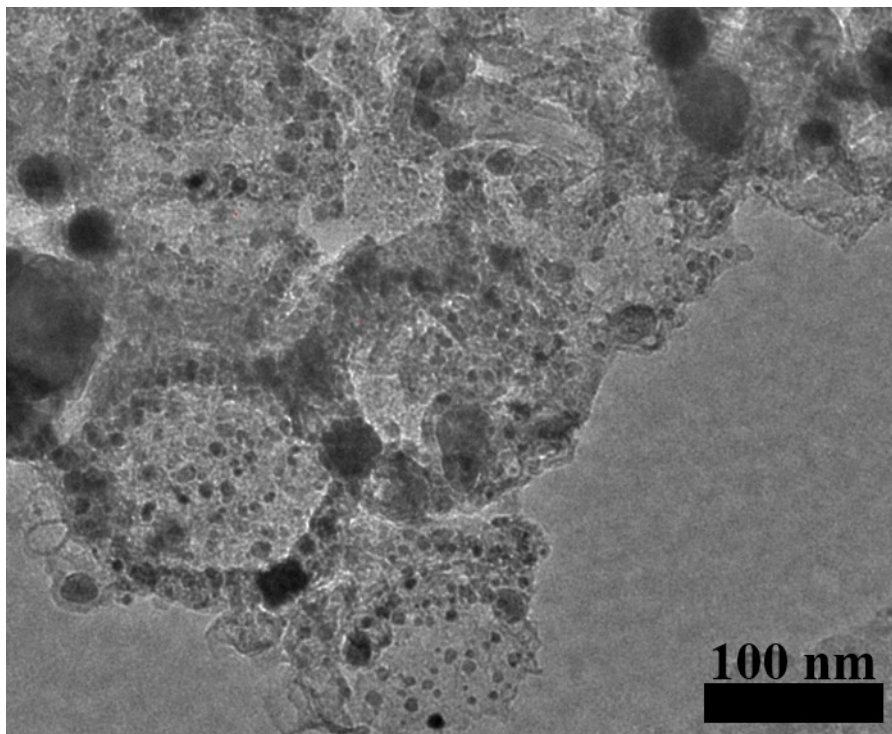

**Figure S18.** TEM image of the CoRu@NCHNSs-8h after OER.

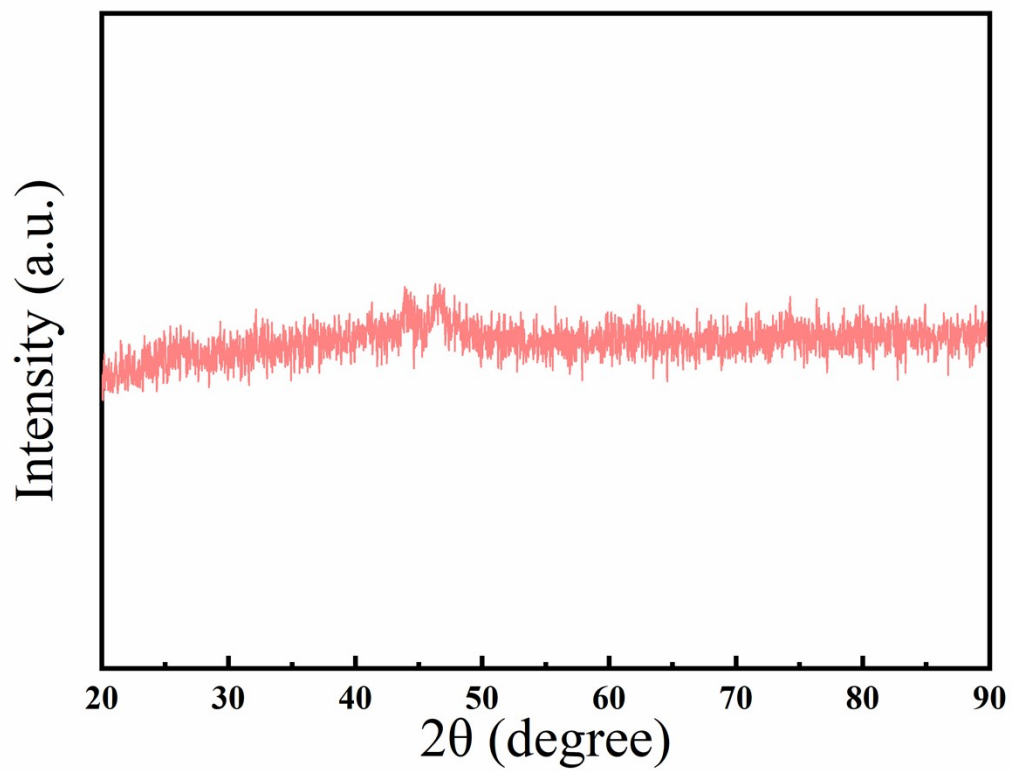

**Figure S19.** XRD pattern of CoRu@NCHNSs-8h after OER.

**Table S1.** HER performance of the CoRu@NCHNSs in this work, in comparison with other state-of-the-art non-noble metal based catalysts in 1.0 M KOH from recent publications.

| Catalysts                                   | Overpotential (mV)        | Reference                                   |
|---------------------------------------------|---------------------------|---------------------------------------------|
|                                             | at 10 mA cm <sup>-2</sup> |                                             |
| S-Fe-Ni                                     | 89                        | J. Mater. Chem. A, 2023, 11, 4661–4671      |
| Pt <sub>SA</sub> -NiO                       | 55                        | ACS Nano 2023, 17, 18539–18547              |
| CoRu <sub>0.5</sub> /CQDs                   | 18                        | Angew. Chem. Int. Ed. 2021, 60, 3290 – 3298 |
| N-FeCoP                                     | 132                       | Small 2023, 19, 2302475                     |
| Co <sub>7</sub> Fe <sub>3</sub> /Co-600     | 68                        | Adv. Sci. 2023, 10, 2301961                 |
| CC/MOF-CoSe <sub>2</sub> @MoSe <sub>2</sub> | 110                       | Chem. Eng. J., 2022 429 132379              |
| NiCu/Co                                     | 68                        | ACS Catal. 2023, 13, 10615–10626            |
| Co/N-NiMo <sub>3</sub> S <sub>4</sub>       | 78                        | Appl. Catal., B, 2023 338 123007            |
| Co-OSP                                      | 132                       | Chem. Eng. J., 2023 465 142853              |
| CoP/CSNSs                                   | 251                       | Chem. Eng. J., 2023 460 141709              |
| Ni-Co-Fe-P NBs                              | 32                        | Appl. Catal., B, 2022 310 121353            |
| CeO <sub>2</sub> -NiCoP <sub>x</sub> /NCF   | 39                        | Appl. Catal., B, 2022 316 121678            |
| Co-Rh <sub>2</sub>                          | 2                         | Adv. Funct. Mater. 2023, 33, 2209134        |
| Fe <sub>2</sub> P/Co@NPC                    | 235                       | J. Mater. Chem. A, 2022, 10, 16037–16045    |
| T-Pt-Co <sub>4</sub> N                      | 31                        | ACS Nano 2022, 16, 18038–18047              |
| NiCoFeB                                     | 174                       | Adv. Energy Mater. 2023, 13, 2203002        |
| (CoSAs-MoS <sub>2</sub> /TiN NRs            | 132                       | Adv. Funct. Mater. 2021, 31, 2100233        |
| Co-Fe-P                                     | 53                        | Chem. Eng. J., 2021 405 127002              |
| (Fe-Co-O/Co@NC-mNS/N                        | 112                       | Small 2021, 17, 2101312                     |
| V-CoP                                       | 46                        | Adv. Energy Mater. 2021, 11, 2101758        |
| <b>CoRu@NCHNSs-9h</b>                       | <b>13</b>                 | <b>This work</b>                            |

**Table S2.** OER performance of the CoRu@NCHNSs in this work, in comparison with other state-of-the-art non-noble metal based catalysts in 1.0 M KOH from recent publications.

| Catalysts                                                            | Overpotential (mV)        | Reference                                      |
|----------------------------------------------------------------------|---------------------------|------------------------------------------------|
|                                                                      | at 10 mA cm <sup>-2</sup> |                                                |
| Co-MOF-74@CoPc                                                       | 291                       | J. Mater. Chem. A, 2023, 11, 8141–8149         |
| Co-ZIF/CDs/CC                                                        | 226                       | Small, 2023, 19, 2206723                       |
| CoMM SACs                                                            | 351                       | J. Am. Chem. Soc. 2023, 145, 8052–8063         |
| Ir/Ni-Co <sub>3</sub> O <sub>4</sub>                                 | 177                       | Adv. Energy Mater., 2023, 2302537              |
| FeSe/Co <sub>2</sub> P/NF                                            | 235                       | J. Mater. Chem. A, 2023, 11, 8330–8341         |
| CoFe LDH HNC                                                         | 238                       | Small, 2023, 2302556                           |
| P-Ce SAs@CoO                                                         | 261                       | Adv. Mater., 2023, 35, 2302462                 |
| S/N-CMF@FexCoyNi1-x-y-MOF                                            | 296                       | Adv. Mater., 2023, 35, 2207888                 |
| M-NiA-CoN                                                            | 180                       | Adv. Funct. Mater., 2023, 33, 2302014          |
| 1-Co                                                                 | 390                       | Angew. Chem. Int. Ed., 2023, 62, e202305938    |
| H-2D Co/Mo <sub>2</sub> C@NC                                         | 256                       | Chem. Eng. J., 2022 435 134815                 |
| SnPi@CoP-Ni <sub>5</sub> P <sub>4</sub> /NCF                         | 180                       | J. Mater. Chem. A, 2022, 10, 13448–13455       |
| FeCoNiMo HEA                                                         | 250                       | ACS Catal., 2022, 12, 10808–10817              |
| O-Co-N/C                                                             | 290                       | Adv. Funct. Mater., 2022, 32, 2200763          |
| Co-POP                                                               | 340                       | Angew. Chem. Int. Ed., 2022, 61, e202201104    |
| Sr <sub>2</sub> CoIrO <sub>6-δ</sub>                                 | 210                       | Adv. Funct. Mater., 2021, 31, 2104746          |
| A-Zn/Co-Fe HNAs                                                      | 226                       | Small, 2021, 17, 2104125                       |
| Ir-O-Co                                                              | 178                       | Angew. Chem. Int. Ed., 2021, 60, 27126 – 27134 |
| Fe-Co-O/Co@NC/NF                                                     | 257                       | Small, 2021, 17, 2101312                       |
| Sr <sub>2</sub> Co <sub>1.5</sub> Fe <sub>0.5</sub> O <sub>6-δ</sub> | 318                       | ACS Catal., 2021, 11, 4327–4337                |
| <b>CoRu@NCHNSs-8h</b>                                                | <b>238</b>                | <b>This work</b>                               |

**Table S3.** ICP-OES analysis for CoRu@NCHNSs-8h and CoRu@NCHNSs-9h.



| Samples | Elements | Wt%   | Atomic ratio |
|---------|----------|-------|--------------|
| CoRu-8h | Co       | 17.44 | 10.48        |
|         | Ru       | 2.85  | 1            |
| CoRu-9h | Co       | 16.86 | 9.82         |
|         | Ru       | 2.94  | 1            |

**Table S4.** overall water splitting performance of the CoP NB in this work, in comparison with other state-of-the-art non-noble metal based catalysts in 1.0 M KOH from recent publications.

| Catalysts                                                            | Overpotential (V)         | Reference                                |
|----------------------------------------------------------------------|---------------------------|------------------------------------------|
|                                                                      | at 10 mA cm <sup>-2</sup> |                                          |
| A-CFWO                                                               | 1.55                      | J. Mater. Chem. A, 2021, 9, 9753–9760    |
| Co <sub>7</sub> Fe <sub>3</sub> /Co                                  | 1.5                       | Adv. Sci., 2023, 10, 2301961             |
| NiCu/Co                                                              | 1.46                      | ACS Catal., 2023, 13, 10615–10626        |
| Co(OH) <sub>2</sub> /La(OH) <sub>3</sub> @Cu NWs                     | 1.56                      | J. Mater. Chem. A, 2023, 11, 4355–4364   |
| Pt@LDH                                                               | 1.49                      | Small, 2023, 19, 2207044                 |
| CoO/ CoP-NC                                                          | 1.53                      | J. Mater. Chem. A, 2023, 11, 3136–3147   |
| Co <sub>7</sub> Fe <sub>3</sub> /Co                                  | 1.50                      | Adv. Sci., 2023, 10, 2301961             |
| Fe <sub>1.2</sub> (CoNi) <sub>1.8</sub> Se <sub>x</sub>              | 1.55                      | Adv. Energy Mater., 2023, 13, 2300837    |
| MOF-MoSAWSA                                                          | 1.50                      | Nano Energy ,2023 112 108450             |
| CoP–Ni <sub>5</sub> P <sub>4</sub> /NF                               | 1.47                      | J. Mater. Chem. A, 2023, 11, 1801–1809   |
| Co-NC@Ni <sub>2</sub> Fe-LDH                                         | 1.55                      | Small, 2022, 18, 2107739                 |
| Sn <sub>4</sub> P <sub>3</sub> /Co <sub>2</sub> P SCNAs              | 1.56                      | Appl. Catal., B, 2022 304 120923         |
| MoS <sub>2</sub> /NiPS <sub>3</sub>                                  | 1.64                      | Adv. Mater., 2022, 34, 2203615           |
| Ni <sub>2</sub> P/WS <sub>2</sub> /Co <sub>9</sub> S <sub>8</sub> @C | 1.48                      | Chem. Eng. J., 2022 406 136961           |
| MoSe <sub>2</sub> @NiCo <sub>2</sub> Se <sub>4</sub>                 | 1.51                      | Small, 2022, 18, 2200622                 |
| CuN <sub>x</sub> Co <sub>x</sub> /NF                                 | 1.53                      | J. Mater. Chem. A, 2022, 10, 15520–15527 |
| Co-Ni <sub>3</sub> S <sub>2</sub>                                    | 1.54                      | Small, 2021, 17, 2102097                 |
| Ni <sub>2</sub> P–CuP <sub>2</sub>                                   | 1.45                      | ACS Nano, 2021, 15, 5586–5599            |
| Fe–Ni <sub>2</sub> P@PC/Cu <sub>x</sub> S                            | 1.62                      | Nano Energy, 2021 84 105861              |
| NCNT-NP@NF                                                           | 1.54                      | ACS Catal., 2021, 11, 4327–4337          |
| <b>CoRu@NCHNSs</b>                                                   | <b>1.56</b>               | <b>This work</b>                         |

## Reference of Supporting information

1. S. Liu, S. Geng, L. Li, Y. Zhang, G. Ren, B. Huang, Z. Hu, J.-F. Lee, Y.-H. Lai, Y.-H. Chu, Y. Xu, Q. Shao and X. Huang, *Nat. Commun.*, 2022, **13**, 1187.
2. C. Wang and L. Qi, *Angew. Chem.-Int. Edit.*, 2020, **59**, 17219-17224.
